# Supplementary material for: Detecting protein complexes in protein interaction networks using a ranking algorithm with a refined merging procedure
Source: Springer Nature journal article supplement (doi:10.1186/1471-2105-15-204), 2014-06-18

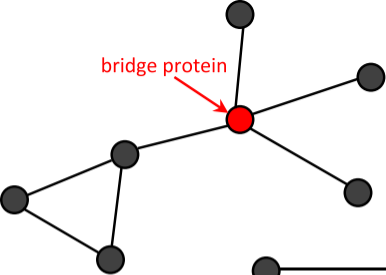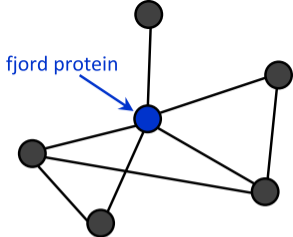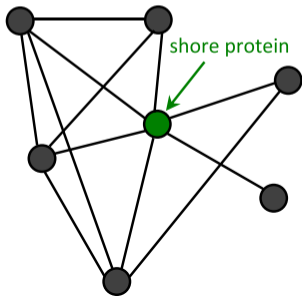

Supplement: 12859_2014_6493_MOESM1_ESM.pdf [file 12859_2014_6493_MOESM1_ESM.pdf]
